# Supplementary material
Source: Research Square preprint supplement (doi:10.21203/rs.3.rs-9095347/v2)
Supplement: Supplementary file 1 [file ee9b398c1b98f5bba2ef6610.docx]

Supplementary Table 1: Full list of CORDEX-CORE and EURO-CORDEX simulations for each variable and each domain used in the study

| **GCM** | **Ensemble** | **RCM** | **pr** | | **tas, tasmin, tasmax** | | **hurs** | | **sfcWind** | |
| --- | --- | --- | --- | --- | --- | --- | --- | --- | --- | --- |
| **RCP2.6** | **RCP8.5** | **RCP2.6** | **RCP8.5** | **RCP2.6** | **RCP8.5** | **RCP2.6** | **RCP8.5** |
| CCCma-CanESM2 | r1i1p1 | CCCma-CanRCM4 | - | AFR, NAM | - | AFR, NAM | - | NAM |  |  |
| r1i1p1 | CLMcom-CCLM4-8-17 | - | EUR | - | EUR | - | - |  |  |
| r1i1p1 | GERICS-REMO2015 | - | EUR | - | EUR | - | - |  |  |
| r1i1p1 | OURANOS-CRCM5 | - | CAM, NAM | - | CAM, NAM | - | - |  |  |
| r1i1p1 | UQAM-CRCM5 | - | NAM | - | NAM | - | NAM |  |  |
| CNRM-CERFACS-CNRM-CM5 | r1i1p1 | CLMcom-CCLM4-8-17 | - | EUR | - | EUR | - | - |  |  |
| r1i1p1 | CLMcom-ETH-COSMO-crCLIM-v1-1 | - | EUR | - | EUR | - | EUR |  |  |
| r1i1p1 | CNRM-ALADIN53 | EUR | EUR | - | EUR | - | EUR |  |  |
| r1i1p1 | CNRM-ALADIN63 | EUR | EUR | EUR | EUR | - | EUR | EUR | EUR |
| r1i1p1 | DMI-HIRHAM5 | - | EUR | - | EUR | - | EUR |  |  |
| r1i1p1 | GERICS-REMO2015 | EUR | EUR | EUR | EUR | EUR | EUR |  | EUR |
| r1i1p1 | ICTP-RegCM4-6 | - | EUR | - | EUR |  | EUR |  |  |
| r1i1p1 | IPSL-WRF381P | - | EUR | - | EUR |  | EUR |  |  |
| r1i1p1 | KNMI-RACMO22E | EUR | EUR | EUR | EUR | - | EUR |  |  |
| r1i1p1 | MOHC-HadREM3-GA7-05 | - | EUR | - | EUR | - | EUR |  |  |
| r1i1p1 | OURANOS-CRCM5 | - | CAM, NAM | - | CAM, NAM | - | - |  |  |
| r1i1p1 | RMIB-UGent-ALARO-0 | EUR | EUR | - | - | - | - |  |  |
| r1i1p1 | SMHI-RCA4 | - | EUR, SEA | - | EUR, SEA | - | EUR, SEA |  | EUR |
| ICHEC-EC-EARTH | r12i1p1 | CLMcom-CCLM4-8-17 | EUR | EUR | EUR | EUR | EUR | - |  |  |
| r12i1p1 | CLMcom-ETH-COSMO-crCLIM-v1-1 | - | EUR, WAS | - | EUR, WAS | - | EUR, WAS |  | EUR |
| r12i1p1 | DMI-HIRHAM5 | - | EUR | - | EUR | - | EUR |  | EUR |
| r12i1p1 | GERICS-REMO2015 | EUR | EUR | EUR | EUR | - | - |  |  |
| r12i1p1 | ICTP-RegCM4-6 | - | EUR | - | EUR | - | EUR |  |  |
| r12i1p1 | IPSL-WRF381P | - | EUR | - | EUR | - | EUR |  |  |
| r12i1p1 | KNMI-RACMO22E | EUR | EUR | EUR | EUR | EUR | EUR |  | EUR |
| r12i1p1 | MOHC-HadREM3-GA7-05 | EUR | EUR | EUR | EUR | EUR | EUR | EUR | EUR |
| r12i1p1 | SMHI-RCA4 | EUR | EUR | EUR | EUR | EUR | EUR | EUR | EUR |
| r12i1p1 | UHOH-WRF361H | - | EUR | - | EUR | - | - |  |  |
| r1i1p1 | CLMcom-ETH-COSMO-crCLIM-v1-1 | - | - | - | EUR | - | EUR |  |  |
| r1i1p1 | DMI-HIRHAM5 | - | EUR | - | EUR | - | EUR | EUR | EUR |
| r1i1p1 | KNMI-RACMO22E | - | EUR | - | EUR | - | EUR |  | EUR |
| r1i1p1 | RU-CORE-RegCM4-3 | - | SEA | - | SEA | - | SEA |  |  |
| r1i1p1 | SMHI-RCA4 | - | EUR | - | EUR | - | EUR |  | EUR |
| r3i1p1 | CLMcom-ETH-COSMO-crCLIM-v1-1 | - | - | - | EUR | - | EUR |  |  |
| r3i1p1 | DMI-HIRHAM5 | EUR | EUR | EUR | EUR | EUR | EUR |  |  |
| r3i1p1 | KNMI-RACMO22E | - | EUR | - | EUR | - | EUR |  | EUR |
| r3i1p1 | SMHI-RCA4 | - | EUR | - | EUR | - | EUR |  | EUR |
| IPSL-IPSL-CM5A-LR | r1i1p1 | RU-CORE-RegCM4-3 | - | SEA | - | SEA | - | SEA |  |  |
| IPSL-IPSL-CM5A-MR | r1i1p1 | DMI-HIRHAM5 | - | - | - | EUR | - | EUR |  |  |
| r1i1p1 | GERICS-REMO2015 | EUR | EUR | - | EUR | - | EUR |  | EUR |
| r1i1p1 | IPSL-INERIS-WRF331F | - | EUR | - | - | - | - |  |  |
| r1i1p1 | IPSL-WRF381P | - | EUR | - | EUR | - | EUR |  |  |
| r1i1p1 | KNMI-RACMO22E | - | EUR | - | EUR | - | EUR |  | EUR |
| r1i1p1 | SMHI-RCA4 | - | EUR | - | EUR | - | EUR |  |  |
| MIROC-MIROC5 | r1i1p1 | CLMcom-CCLM4-8-17 | EUR | EUR | - | EUR | - | - |  |  |
| r1i1p1 | GERICS-REMO2015 | EUR | EUR | EUR | EUR | - | - |  |  |
| r1i1p1 | ORNL-RegCM4-7 | WAS | WAS | - | WAS | - | WAS |  | WAS |
| MOHC-HadGEM2-ES | r1i1p1 | CLMcom-CCLM4-8-17 | - | EUR | - | EUR | - | - |  |  |
| r1i1p1 | CLMcom-ETH-COSMO-crCLIM-v1-1 | - | EUR | - | EUR | - | EUR |  |  |
| r1i1p1 | CLMcom-HZG-CCLM5-0-15 | AUS | AUS | AUS | AUS | AUS | AUS |  |  |
| r1i1p1 | CLMcom-KIT-CCLM5-0-15 | AFR | AFR | - | AFR | AFR | AFR |  |  |
| r1i1p1 | CNRM-ALADIN63 | - | EUR | - |  | - | - |  |  |
| r1i1p1 | DMI-HIRHAM5 | - | EUR | - |  | - | - | EUR | EUR |
| r1i1p1 | GERICS-REMO2015 | ALL | ALL | ALL | ALL | ALL | ALL | ALL | ALL |
| r1i1p1 | ICTP-RegCM4-4 | EAS | EAS | EAS | EAS | EAS | EAS |  |  |
| r1i1p1 | ICTP-RegCM4-6 | EUR | EUR | EUR | EUR | EUR | EUR | EUR | EUR |
| r1i1p1 | ICTP-RegCM4-7 | AFR, AUS, CAM, SAM, SEA | AFR, AUS, CAM, SAM, SEA | AFR, AUS, CAM, SAM, SEA | AFR, AUS, CAM, SAM, SEA | AFR, AUS, CAM, SAM, SEA | AFR, AUS, CAM, SAM, SEA | AFR, AUS, CAM, SAM, SEA | AFR, AUS, CAM, SAM, SEA |
| r1i1p1 | IPSL-WRF381P | - | EUR | - | EUR | - | EUR |  |  |
| r1i1p1 | ISU-RegCM4-4 | - | NAM | - | NAM | - | NAM |  |  |
| r1i1p1 | KNMI-RACMO22E | EUR | EUR | EUR | EUR | EUR | EUR |  | EUR |
| r1i1p1 | MOHC-HadREM3-GA7-05 | EUR | EUR | EUR | EUR | EUR | EUR |  | EUR |
| r1i1p1 | NCAR-WRF351 | - | NAM | - | NAM | - | NAM |  |  |
| r1i1p1 | RU-CORE-RegCM4-3 | - | SEA | - | SEA | - | - |  |  |
| r1i1p1 | SMHI-RCA4 | EUR | EUR, SEA | EUR | EUR, SEA | EUR | EUR, SEA | EUR | EUR |
| r1i1p1 | UHOH-WRF361H | - | EUR | - | EUR | - | - |  |  |
| MPI-M-MPI-ESM-LR | r1i1p1 | CLMcom-BTU-CCLM4-8-17 | EUR | - | - | - | EUR |  |  |  |
| r1i1p1 | CLMcom-CCLM4-8-17 | - | EUR | - | EUR | - | - |  |  |
| r1i1p1 | CLMcom-ETH-COSMO-crCLIM-v1-1 | WAS | EUR, WAS | - | EUR, WAS | - | EUR, WAS |  | EUR |
| r1i1p1 | CLMcom-HZG-CCLM5-0-15 | AUS | AUS | AUS | AUS | AUS | AUS |  |  |
| r1i1p1 | CLMcom-KIT-CCLM5-0-15 | AFR | AFR | AFR | AFR | AFR | AFR |  |  |
| r1i1p1 | CNRM-ALADIN63 | - | EUR | - | EUR | - | EUR |  |  |
| r1i1p1 | DMI-HIRHAM5 | - | EUR | - | EUR | - | EUR |  | EUR |
| r1i1p1 | GERICS-REMO2015 | AFR, AUS, CAM, EAS, NAM, SAM, SEA, WAS | AFR, AUS, CAM, EAS, NAM, SAM, SEA, WAS | AFR, AUS, CAM, EAS, NAM, SAM, SEA, WAS | AFR, AUS, CAM, EAS, NAM, SAM, SEA, WAS | AFR, AUS, CAM, EAS, NAM, SAM, SEA, WAS | AFR, AUS, CAM, EAS, NAM, SAM, SEA, WAS | AFR, AUS, CAM, EAS, NAM, SAM, SEA, WAS | AFR, AUS, CAM, EAS, NAM, SAM, SEA, WAS |
| r1i1p1 | ICTP-RegCM4-6 | EUR | EUR | EUR | EUR | EUR | EUR | EUR | EUR |
| r1i1p1 | IPSL-WRF381P | - | EUR | - | EUR | - | EUR |  |  |
| r1i1p1 | KNMI-RACMO22E | - | EUR | - | EUR | - | EUR | EUR | EUR |
| r1i1p1 | MOHC-HadREM3-GA7-05 | - | EUR | - | EUR | - | EUR |  |  |
| r1i1p1 | MPI-CSC-REMO2009 | EUR | EUR | EUR | EUR | - | - |  |  |
| r1i1p1 | NCAR-RegCM4-4 | - | NAM | - | NAM | - | NAM |  |  |
| r1i1p1 | OURANOS-CRCM5 | - | NAM | - | NAM | - | - |  |  |
| r1i1p1 | SMHI-RCA4 | EUR | EUR | EUR | EUR | - | EUR | EUR | EUR |
| r1i1p1 | UA-WRF351 | - | NAM | - | NAM | - | NAM |  |  |
| r1i1p1 | UHOH-WRF361H | EUR | EUR | EUR | EUR | - | - |  |  |
| r1i1p1 | UQAM-CRCM5 | - | NAM | - | NAM | - | NAM |  |  |
| r2i1p1 | CLMcom-ETH-COSMO-crCLIM-v1-1 | - | EUR | - | EUR | - | EUR |  | EUR |
| r2i1p1 | MPI-CSC-REMO2009 | EUR | EUR | EUR | EUR | - | - |  |  |
| r2i1p1 | SMHI-RCA4 | - | EUR | - | EUR | - | EUR |  | EUR |
| r3i1p1 | CLMcom-ETH-COSMO-crCLIM-v1-1 | - | EUR | - | EUR | - | EUR |  |  |
| r3i1p1 | GERICS-REMO2015 | - | EUR | - | EUR | - | EUR |  | EUR |
| r3i1p1 | SMHI-RCA4 | - | EUR | - | EUR | - | EUR |  | EUR |
| MPI-M-MPI-ESM-MR | r1i1p1 | ICTP-RegCM4-7 | AFR, AUS, CAM, SAM, SEA | AFR, AUS, CAM, SAM, SEA | AFR, AUS, CAM, SAM, SEA | AFR, AUS, CAM, SAM, SEA | AFR, AUS, CAM, SAM, SEA | AFR, AUS, CAM, SAM, SEA | AFR, AUS, CAM, SAM, SEA | AFR, AUS, CAM, SAM, SEA |
| r1i1p1 | ICTP-RegCM4-4 | EAS | EAS | EAS | EAS | EAS | EAS |  |  |
| r1i1p1 | ORNL-RegCM4-7 | WAS | WAS | WAS | WAS | - | WAS |  |  |
| r1i1p1 | RU-CORE-RegCM4-3 | - | SEA | - | SEA | - | SEA |  |  |
| r1i1p1 | UQAM-CRCM5 | - | NAM | - | NAM | - | NAM |  |  |
| NCC-NorESM1-M | r1i1p1 | CLMcom-ETH-COSMO-crCLIM-v1-1 | WAS | EUR, WAS | - | EUR, WAS | - | EUR, WAS |  |  |
| r1i1p1 | CLMcom-HZG-CCLM5-0-15 | AUS | AUS | AUS | AUS | AUS | AUS |  |  |
| r1i1p1 | CLMcom-KIT-CCLM5-0-15 | AFR | AFR | AFR | AFR | AFR | AFR |  |  |
| r1i1p1 | CNRM-ALADIN63 | - | EUR |  | EUR | - | EUR |  |  |
| r1i1p1 | DMI-HIRHAM5 | - | EUR |  | EUR | - | EUR |  |  |
| r1i1p1 | GERICS-REMO2015 | ALL | ALL | ALL | ALL | ALL | ALL | EUR, NAM, CAM, SAM | EUR, NAM, CAM, SAM |
| r1i1p1 | ICTP-RegCM4-6 | EUR | EUR | EUR | EUR | EUR | EUR | EUR | EUR |
| r1i1p1 | ICTP-RegCM4-7 | AFR, AUS, SAM, SEA | AFR, AUS, SAM, SEA | AFR, AUS, SAM, SEA | AFR, AUS, SAM, SEA | AFR, AUS, SAM, SEA | AFR, AUS, SAM, SEA | AFR, AUS, SAM, SEA | AFR, AUS, SAM, SEA |
| r1i1p1 | ICTP-RegCM4-4 | EAS | EAS | EAS | EAS | EAS | EAS |  |  |
| r1i1p1 | IPSL-WRF381P | - | EUR | - | EUR | - | EUR |  |  |
| r1i1p1 | KNMI-RACMO22E | EUR | EUR | EUR | EUR | EUR | EUR | EUR | EUR |
| r1i1p1 | MOHC-HadREM3-GA7-05 | - | EUR | - | EUR | - | EUR |  |  |
| r1i1p1 | ORNL-RegCM4-7 | WAS | WAS | - | WAS | - | WAS |  |  |
| r1i1p1 | SMHI-RCA4 | EUR | EUR | EUR | EUR | EUR | EUR | EUR | EUR |
| NOAA-GFDL-GFDL-ESM2G | r1i1p1 | GERICS-REMO2015 | EUR | - | EUR | - | - | - |  |  |
| NOAA-GFDL-GFDL-ESM2M | r1i1p1 | ICTP-RegCM4-7 | CAM | CAM | CAM | CAM | CAM | CAM | CAM | NAM, CAM |
| r1i1p1 | ISU-RegCM4-4 | - | NAM | - | NAM | - | NAM |  |  |
| r1i1p1 | NCAR-WRF351 | - | NAM | - | NAM | - | NAM |  |  |
| r1i1p1 | OURANOS-CRCM5 | - | CAM, NAM | - | CAM, NAM | - | - |  |  |
| r1i1p1 | RU-CORE-RegCM4-3 | - | SEA | - | SEA | - | - |  |  |

Supplementary Table 2: Details of the two global coastal flood datasets adopted in the analysis, according to their different methodological frameworks.

|  | **NO_PROT**  **Kirezci et al. (2020)** | **PROT**  **Tiggeloven et al. (2020)** |
| --- | --- | --- |
| Description | Projection of extreme sea levels (ESLs) and associated episodic coastal flooding under sea-level rise scenarios. | Assessment of flood impacts and adaptation efficiency, including benefits of protection measures. |
| Hazard components | Astronomical tide, storm surge, wave setup, and regional sea-level rise (RSLR). | Astronomical tide and storm surge, regional sea-level rise, and land subsidence (from groundwater extraction). |
| Input data | Finite Element Solution (FES2014) model dataset for tide; Global Tide and Surge Reanalysis (GTSR) dataset for surge; global wave model reanalysis dataset for wave setup; RSLR from Church et al. (2013). | GTSR dataset (Muis et al., 2016) + enriched tropical cyclone tracks (IBTrACS); Regional SLR from Jackson & Jevrejeva (2016); subsidence from SUB-CR model (Kooi et al., 2018). |
| Extreme value analysis | Peak-over-Threshold approach (PoT) with Generalized Pareto Distribution (GPD) | Gumbel distribution fitted to annual extremes from GTSR and cyclone simulations. |
| Inundation modelling | GIS-based static inundation model at global scale using MERIT DEM dataset; identifies flooded areas below ESL. | GIS-based inundation routine using MERIT DEM, including inland flood attenuation, and vertical datum corrections. |
| Return periods | 1, 10, 100 years | 2,10,100 years |
| Future scenarios | RSLR for RCP4.5/8.5, 2050/2100 | SLR for RCP4.5 and RCP8.5,  2030/2050/2080 |
| Flood impact metrics | Flooded area, exposed population, and exposed assets. | Expected Annual Damage (EAD) derived from hazard–exposure–vulnerability integration;. |
| Treatment of adaptation | No coastal protection or adaptation assumed. | Includes structural protection measures (e.g., dikes) and evaluates cost-effectiveness. |
| Overall focus | Hazard and exposure assessment (where and how much flooding). | Risk and adaptation efficiency (how much protection is economically justified). |
